# Supplementary material
Source: MDPI journal article supplement (https://www.mdpi.com/2311-7524/7/6/134)
Supplement: s1 [file s1]

# Supplementary Materials: Postharvest Fumigation of Fresh Citrus with Cylinderized Phosphine to Control Bean Thrips (Thysanoptera: Thripidae)

Spencer S. Walse and Leonel R. Jimenez

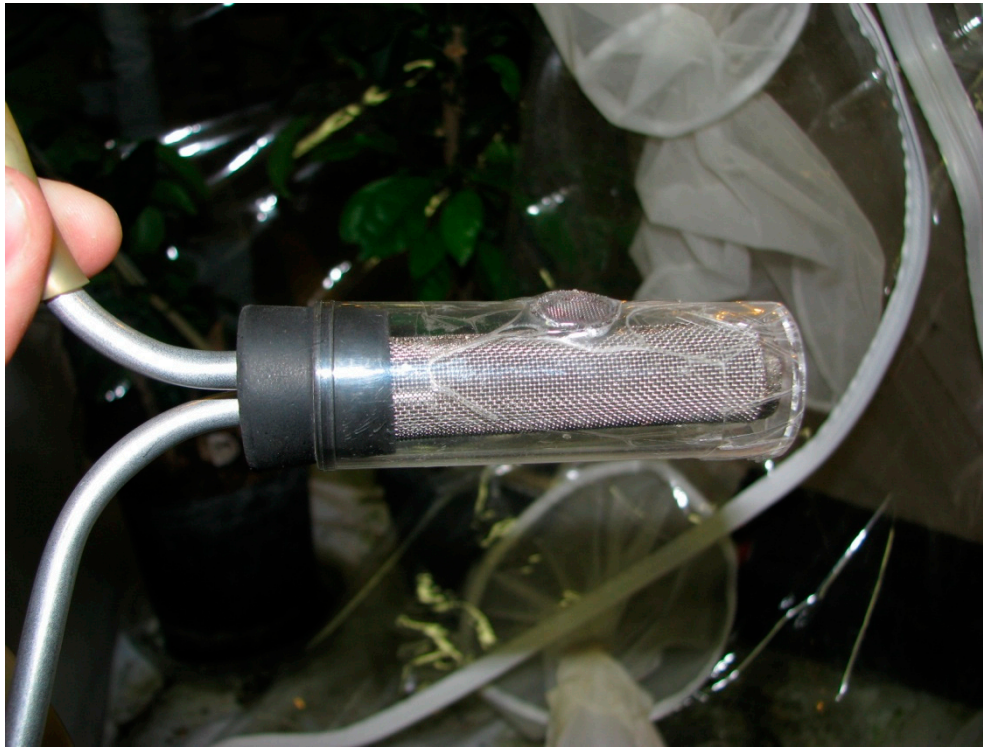

**Figure S1.** Method of collecting adult bean thrips (BT), *Caliothrips fasciatus*, (and other small insects) into metal mesh cages using a standard mouth aspirator apparatus.

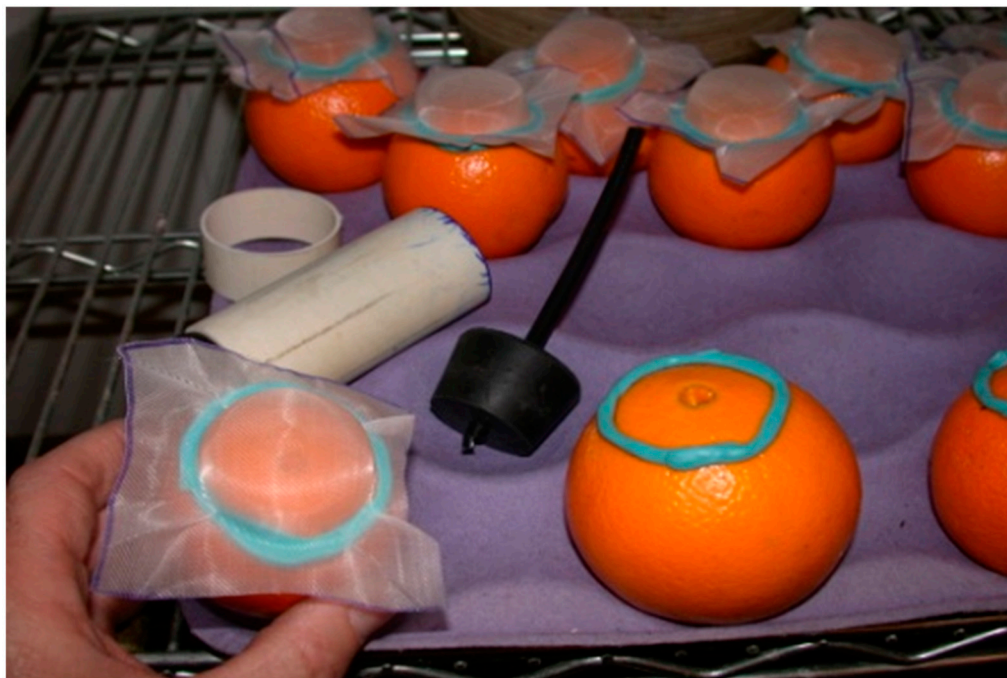

**Figure S2.** To contain the bean thrips (BT) in the navel for treatment, a nylon mesh disc was anchored to a ring of “sticky-tac” mounting putty oriented concentric to the navel.

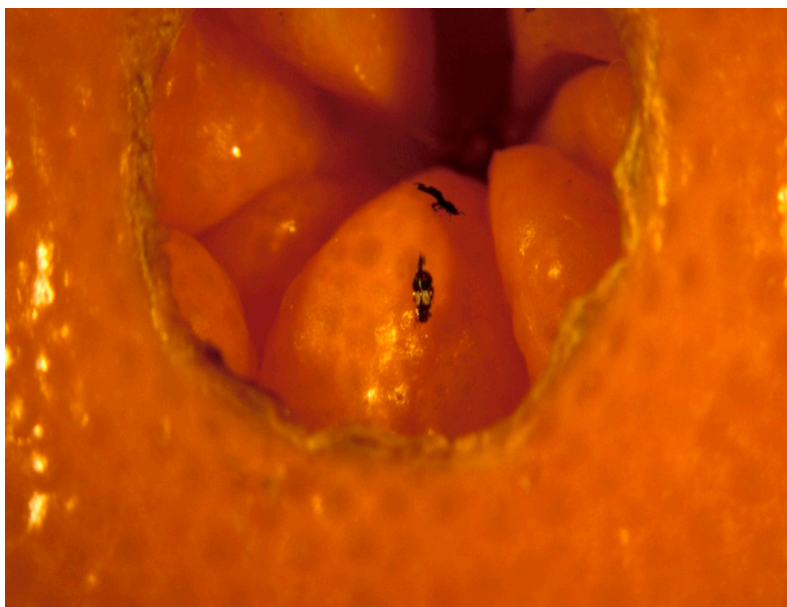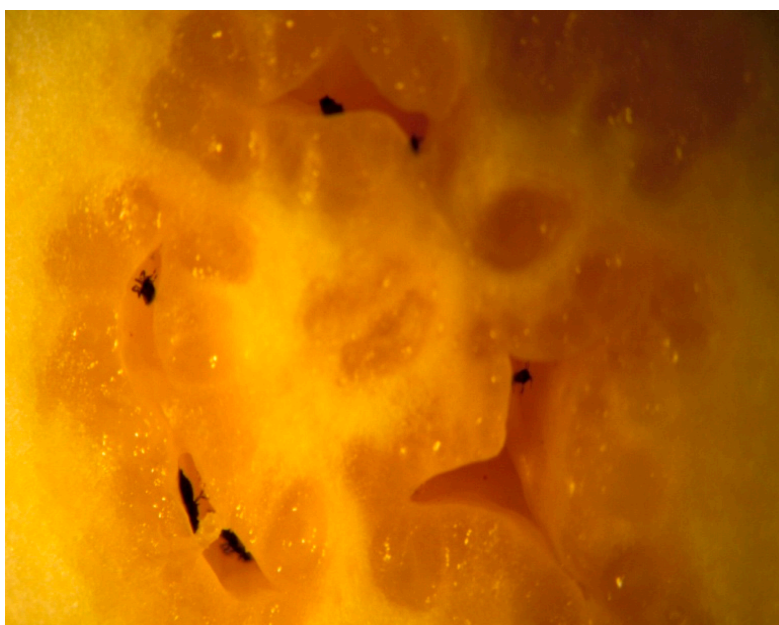

**Figure S3.** Following the confirmatory fumigation trials, bean thrips (BT) specimens on the external surface of the navel were evaluated and then 1- to 2-mm thick slices of peel were removed with a razor to allow transactional observation (and collection) of specimens through the depth of the navel.
